# Supplementary material for: Procyanidins from Cranberry Press Residues—Extraction Optimization, Purification and Characterization
Source: MDPI journal article supplement (doi:10.3390/plants11243517), 2022-12-14

**Figure S1.** The top ten most frequently detected fragments across the ddMS<sup>2</sup> dataset at a collision energy of 20 eV

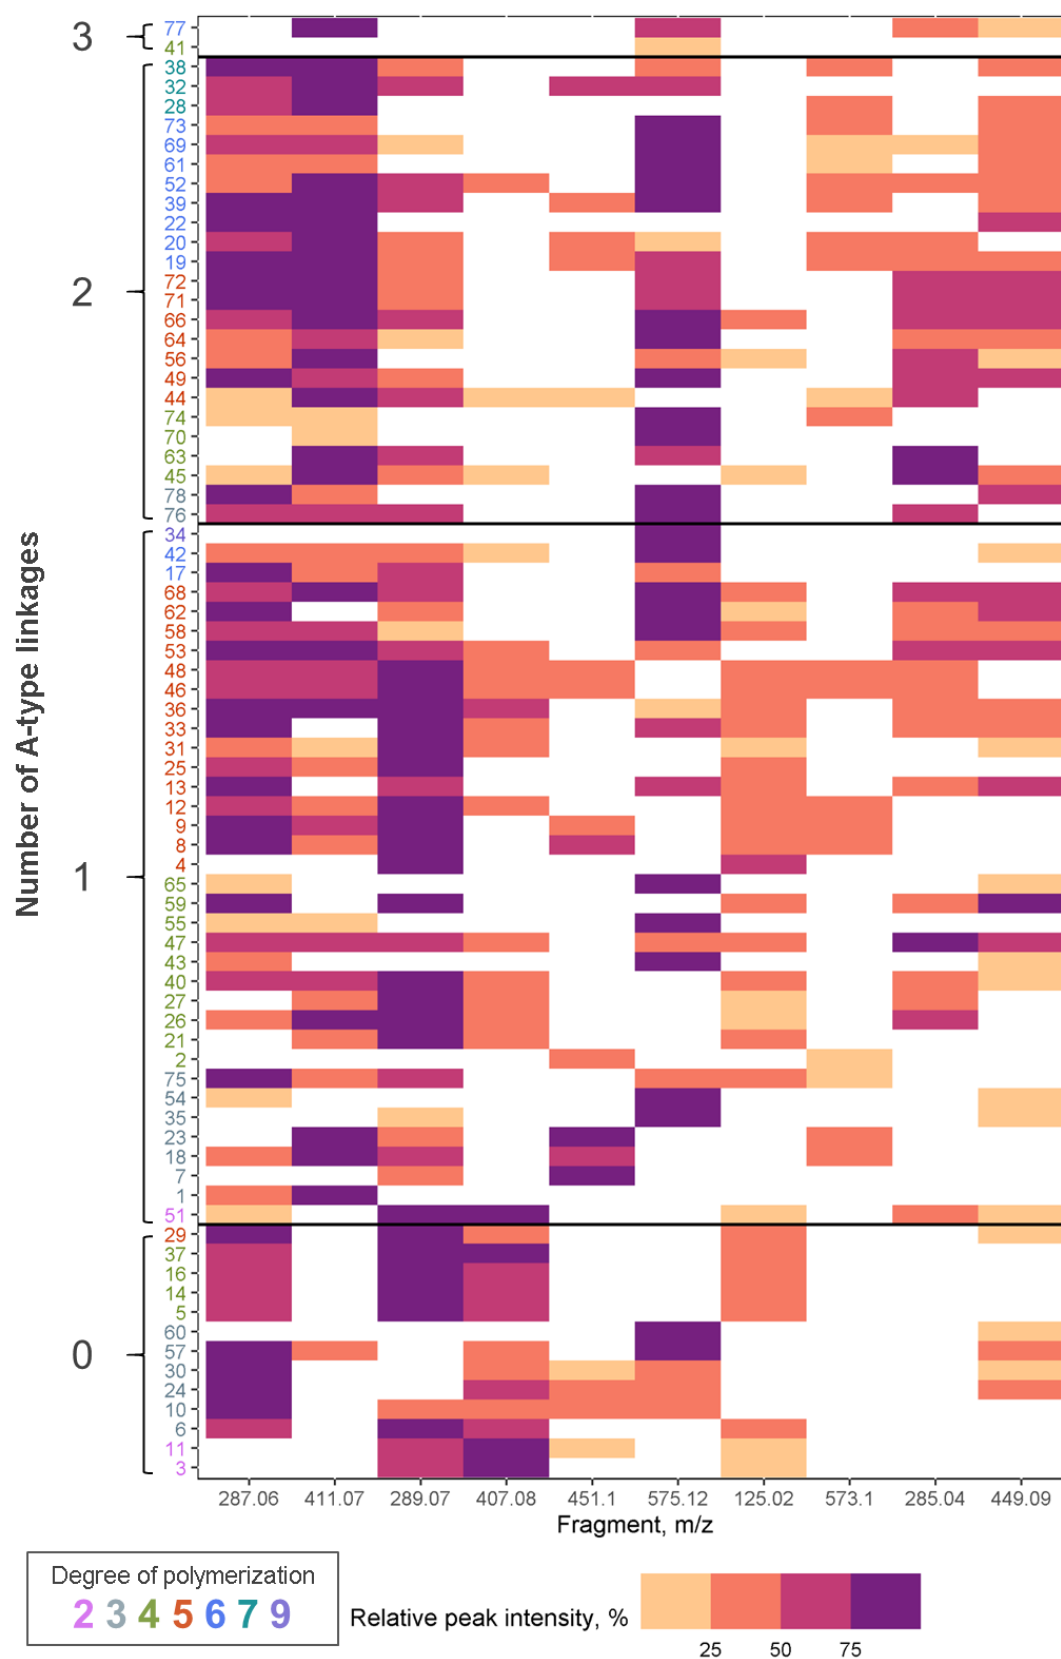

Supplement: s1 [file s1]
