# Supplementary material for: Procyanidins from Cranberry Press Residues—Extraction Optimization, Purification and Characterization
Source: Plants (Basel). 2022 Dec 14;11(24):3517. doi: 10.3390/plants11243517 (PMC9786595; doi:10.3390/plants11243517)
Supplement: Supplementary file 1 [file plants-11-03517-s001.zip › Data S1.xlsx]

## Sheet: HRMS results
Compound No.	Retention time, min	Area (abs.)	Area (rel.), %	Measured m/z	Mass error, ppm	Molecular formula	Species (for full-MS EIC)	Monomers	Degree of polymerization	Type (A or B)	No. of A-type linkages	Precursor species for ddMS2 experiments	Major ddMS2 fragments, m/z (relative abundance, %)
													CE = 10 eV	CE = 20 eV	CE = 35 eV
1	9.84	81000000	0.151685	879.177	0.9	C45H36O19	[M-H]-	(E)C, (E)GC	3	A	1	[M-H]-	727.129(81%), 879.178(100%)	287.056(45%), 315.051(100%), 411.072(89%)	153.019(60%), 285.041(75%), 411.072(100%)
2	9.99	900000000	1.68539	575.12	-0.1	C60H48O24	[M-2H]2-	(E)C	4	A	1	[M-H]-	NA	451.103(26%), 531.094(25%), 573.103(23%), 711.137(37%), 863.182(100%)	289.072(43%), 299.056(27%), 411.072(100%), 451.104(35%), 573.104(30%)
3	10.2	520000000	0.973783	577.135	0.5	C30H26O12	[M-H]-	(E)C	2	B	0	[M-H]-	287.056(23%), 407.077(27%), 425.088(100%)	125.024(11%), 245.082(11%), 289.072(70%), 299.056(9%), 407.077(100%)	125.024(96%), 203.071(86%), 255.03(100%), 281.046(94%), 285.04(98%)
4	11.49	320000000	0.599251	719.151	0.6	C75H60O30	[M-2H]2-	(E)C	5	A	1	[M-2H]2-	287.056(100%)	125.024(54%), 245.045(57%), 289.072(100%), 403.046(49%)	125.024(100%), 243.03(99%), 285.04(98%), 403.046(93%)
5	11.55	330000000	0.617978	576.127	0.4	C60H50O24	[M-2H]2-	(E)C	4	B	0	[M-2H]2-	125.024(29%), 287.056(58%), 289.072(100%), 407.077(25%), 451.104(30%)	125.024(47%), 243.03(41%), 287.056(62%), 289.072(100%), 407.077(67%)	125.024(100%), 243.03(91%)
6	11.58	99000000	0.185393	865.198	0.3	C45H38O18	[M-H]-	(E)C	3	B	0	[M-H]-	NA	125.024(47%), 243.03(41%), 287.056(62%), 289.072(100%), 407.077(67%)	125.024(41%), 243.03(73%), 287.056(38%), 289.072(64%), 407.077(100%)
7	11.89	130000000	0.243446	879.177	0.8	C45H36O19	[M-H]-	(E)C, (E)GC	3	A	1	[M-H]-	727.13(100%)	289.072(43%), 299.056(40%), 427.067(100%), 451.103(82%), 727.131(69%)	243.03(22%), 245.082(22%), 289.072(73%), 301.035(100%), 407.077(60%), 427.067(61%)
8	11.9	130000000	0.243446	719.151	0.6	C75H60O30	[M-2H]2-	(E)C	5	A	1	[M-2H]2-	575.119(100%), 863.183(69%)	287.056(100%), 289.072(89%), 411.072(49%), 451.104(57%), 573.104(42%)	125.024(89%), 243.03(100%), 285.04(81%), 289.072(74%), 411.072(79%)
9	12.25	330000000	0.617978	719.151	0.7	C75H60O30	[M-2H]2-	(E)C	5	A	1	[M-2H]2-	575.118(100%)	243.03(45%), 287.056(100%), 289.072(98%), 411.072(60%), 451.103(49%)	125.024(79%), 243.03(100%), 285.04(97%), 287.056(70%), 411.072(72%)
10	12.76	400000000	0.749064	865.199	-0.4	C45H38O18	[M-H]-	(E)C	3	B	0	[M-H]-	575.119(80%), 577.136(100%)	287.056(100%), 407.077(43%), 425.088(54%), 577.135(59%), 695.142(50%)	125.024(38%), 243.03(62%), 287.056(63%), 289.072(69%), 407.077(100%)
11	12.77	3200000000	5.99251	577.135	-0.1	C30H26O12	[M-H]-	(E)C	2	B	0	[M-H]-	287.056(13%), 407.077(28%), 425.088(100%), 451.104(15%)	203.539(7%), 245.082(6%), 289.072(50%), 299.056(6%), 407.077(100%), 425.088(10%)	125.024(64%), 203.071(61%), 255.03(100%), 281.046(92%), 285.04(90%)
12	12.85	360000000	0.674157	719.151	0.1	C75H60O30	[M-2H]2-	(E)C	5	A	1	[M-2H]2-	289.072(100%), 577.135(30%), 861.17(18%), 1151.25(40%)	125.024(43%), 287.056(50%), 289.072(100%), 411.072(42%), 573.104(41%)	125.024(94%), 285.041(100%), 289.072(95%), 407.077(90%), 411.072(98%)
13	13.32	400000000	0.749064	719.151	0.7	C75H60O30	[M-2H]2-	(E)C	5	A	1	[M-2H]2-	575.119(100%), 863.184(48%)	125.024(30%), 287.056(100%), 289.072(53%), 449.088(54%), 575.118(69%)	125.024(66%), 243.03(100%), 285.04(67%), 287.056(46%), 289.072(35%)
14	13.6	450000000	0.842697	576.127	0.4	C60H50O24	[M-2H]2-	(E)C	4	B	0	[M-2H]2-	287.056(45%), 289.072(100%), 411.072(34%), 577.138(33%)	125.024(44%), 243.03(45%), 287.056(66%), 289.072(100%), 407.077(68%)	125.024(90%), 161.024(41%), 243.03(100%)
15	13.85	170000000	0.318352	575.119	0.3	C60H48O24	[M-2H]2-	(E)C	4	A	1	NA	NA	NA	NA
16	14.03	590000000	1.10487	576.127	0.2	C60H50O24	[M-2H]2-	(E)C	4	B	0	[M-2H]2-	125.024(19%), 287.056(37%), 289.072(100%), 449.087(17%)	125.024(38%), 243.03(47%), 287.056(64%), 289.072(100%), 407.077(63%)	125.024(100%), 161.024(34%), 175.04(37%), 203.071(39%), 243.03(87%)
17	14.33	200000000	0.374532	863.182	0.9	C90H72O36	[M-2H]2-	(E)C	6	A	1	[M-2H]2-	575.117(92%), 719.146(100%)	287.056(100%), 289.072(75%), 411.072(34%), 575.12(34%), 711.137(16%)	285.04(88%), 287.056(79%), 289.072(100%), 411.072(92%), 439.067(99%)
18	14.66	560000000	1.04869	863.182	1.4	C45H36O18	[M-H]-	(E)C	3	A	1	[M-H]-	451.103(30%), 575.12(62%), 711.136(100%)	289.072(67%), 411.072(100%), 451.103(74%), 573.104(47%), 711.135(72%)	285.04(71%), 289.072(54%), 407.077(40%), 411.072(100%), 541.078(18%)
19	14.78	270000000	0.505618	862.174	1	C90H70O36	[M-2H]2-	(E)C	6	A	2	[M-2H]2-	575.12(100%)	287.056(97%), 289.072(44%), 411.072(100%), 449.088(42%), 575.119(70%)	125.024(59%), 243.03(60%), 285.04(100%), 289.072(59%), 411.072(79%)
20	15.57	930000000	1.74157	862.175	0.4	C90H70O36	[M-2H]2-	(E)C	6	A	2	[M-2H]2-	575.12(100%), 711.13(35%), 1151.237(38%)	287.056(69%), 289.072(38%), 411.072(100%), 573.104(38%), 863.182(33%)	243.03(28%), 285.04(75%), 287.056(36%), 289.072(48%), 411.072(100%)
21	15.95	550000000	1.02996	575.119	0.2	C60H48O24	[M-2H]2-	(E)C	4	A	1	[M-2H]2-	289.072(100%), 451.104(43%), 490.089(39%), 499.096(49%), 499.597(34%)	125.024(26%), 289.072(100%), 407.077(42%), 411.072(44%), 529.079(31%)	125.024(100%), 243.03(99%), 285.04(76%)
22	16.28	160000000	0.299625	862.174	0.8	C90H70O36	[M-2H]2-	(E)C	6	A	2	[M-2H]2-	575.12(100%)	287.056(100%), 411.072(84%), 449.087(50%), 573.105(44%)	125.024(30%), 285.04(67%), 287.056(45%), 289.072(48%), 411.072(100%)
23	16.54	2200000000	4.11985	863.183	-0.1	C45H36O18	[M-H]-	(E)C	3	A	1	[M-H]-	451.103(37%), 573.104(17%), 711.135(100%)	299.056(51%), 411.072(100%), 451.104(85%), 559.088(49%), 711.136(84%)	285.04(56%), 289.072(51%), 407.077(37%), 411.072(100%), 541.078(21%)
24	17.3	1500000000	2.80899	865.198	0.8	C45H38O18	[M-H]-	(E)C	3	B	0	[M-H]-	575.119(74%), 577.135(100%), 713.151(47%)	287.056(100%), 407.077(55%), 425.088(68%), 577.135(78%), 695.14(68%)	125.024(23%), 243.03(44%), 287.056(38%), 289.072(51%), 407.077(100%)
25	18.05	320000000	0.599251	719.151	0.5	C75H60O30	[M-2H]2-	(E)C	5	A	1	[M-2H]2-	287.056(100%), 575.12(84%), 863.185(60%)	125.024(30%), 243.03(35%), 287.056(52%), 289.072(100%), 411.072(33%)	125.024(55%), 243.03(100%), 285.04(72%), 289.072(48%), 411.072(59%)
26	18.45	1500000000	2.80899	575.119	0.2	C60H48O24	[M-2H]2-	(E)C	4	A	1	[M-2H]2-	287.056(27%), 289.072(100%), 411.072(44%), 573.102(13%), 861.167(14%)	285.04(52%), 287.056(43%), 289.072(100%), 407.077(33%), 411.072(90%)	125.024(73%), 203.071(54%), 243.03(70%), 285.04(100%), 411.072(52%)
27	19.56	1400000000	2.62172	575.119	0.4	C60H48O24	[M-2H]2-	(E)C	4	A	1	[M-2H]2-	289.072(68%), 451.103(26%), 499.096(100%), 577.135(11%), 861.168(11%)	285.04(27%), 289.072(100%), 407.077(38%), 411.072(34%), 529.078(26%)	125.024(91%), 151.04(49%), 203.071(46%), 243.03(100%), 255.03(46%), 285.04(91%)
28	20.38	320000000	0.599251	1006.21	0.5	C105H82O42	[M-2H]2-	(E)C	7	A	2	[M-2H]2-	575.12(72%), 719.15(51%), 861.166(68%), 863.18(79%), 1153.257(100%)	287.056(57%), 411.072(100%), 573.103(41%), 861.162(28%), 863.178(33%)	125.024(21%), 285.04(53%), 287.056(51%), 289.072(32%), 411.072(100%)
29	20.89	360000000	0.674157	720.159	0.4	C75H62O30	[M-2H]2-	(E)C	5	B	0	[M-2H]2-	289.072(100%), 575.119(58%), 863.179(34%), 1151.243(23%)	125.024(33%), 287.056(100%), 289.072(90%), 405.062(29%), 407.077(48%)	125.024(87%), 243.03(100%), 285.04(46%), 289.072(50%), 407.078(49%)
30	21.2	570000000	1.06742	865.198	0.4	C45H38O18	[M-H]-	(E)C	3	B	0	[M-H]-	575.12(100%), 577.137(33%), 713.149(45%)	287.056(100%), 407.077(46%), 425.088(54%), 575.12(33%), 577.135(45%)	125.024(32%), 243.03(42%), 287.056(47%), 289.072(37%), 407.077(100%)
31	21.21	400000000	0.749064	719.151	0.4	C75H60O30	[M-2H]2-	(E)C	5	A	1	[M-2H]2-	289.072(100%), 575.12(20%), 643.128(52%), 863.178(12%), 997.169(12%), 1149.234(15%)	125.024(20%), 287.056(47%), 289.072(100%), 407.077(34%), 529.078(27%)	125.024(74%), 243.03(100%), 285.04(81%), 289.072(74%), 407.077(68%)
32	21.6	220000000	0.411985	1006.21	0.5	C105H82O42	[M-2H]2-	(E)C	7	A	2	[M-2H]2-	863.183(100%), 930.698(63%)	287.056(71%), 411.072(100%), 451.104(68%), 573.105(82%), 863.18(100%)	285.04(52%), 287.056(50%), 289.072(51%), 411.072(100%), 529.077(51%)
33	21.65	370000000	0.692884	719.151	0.5	C75H60O30	[M-2H]2-	(E)C	5	A	1	[M-2H]2-	287.056(33%), 289.072(53%), 575.119(100%), 577.134(32%), 863.185(44%)	287.056(100%), 289.072(81%), 407.078(45%), 449.087(42%), 575.119(70%)	125.024(58%), 243.03(95%), 285.04(100%)
34	22.05	130000000	0.243446	1295.28	-0.3	C135H108O54	[M-2H]2-	(E)C	9	A	1	[M-2H]2-	711.137(9%), 863.183(100%), 1727.368(22%), 1730.405(6%)	559.088(25%), 575.12(100%), 693.127(17%), 711.135(66%), 863.183(98%)	449.088(22%), 559.088(51%), 575.12(100%), 693.124(40%), 711.134(24%)
35	22.07	2300000000	4.30712	863.183	-0.6	C45H36O18	[M-H]-	(E)C	3	A	1	[M-H]-	287.056(9%), 559.088(9%), 575.119(85%), 711.136(100%)	449.088(10%), 559.088(36%), 575.12(100%), 693.125(38%), 711.136(24%)	285.04(100%), 289.072(65%), 407.077(93%), 449.088(57%), 567.093(67%)
36	22.27	1200000000	2.24719	719.151	-0.2	C75H60O30	[M-2H]2-	(E)C	5	A	1	[M-2H]2-	289.072(100%), 411.072(100%), 575.119(57%), 577.136(78%), 861.166(54%)	285.04(42%), 287.056(81%), 289.072(84%), 407.077(54%), 411.072(100%)	125.024(76%), 243.03(68%), 285.04(100%), 407.078(51%), 411.072(75%)
37	22.29	280000000	0.524345	576.128	-0.7	C60H50O24	[M-2H]2-	(E)C	4	B	0	[M-2H]2-	287.056(38%), 289.072(100%), 411.072(23%)	125.024(42%), 243.03(38%), 287.056(56%), 289.072(100%), 407.077(80%)	125.024(100%), 243.03(100%)
38	22.47	310000000	0.580524	1006.21	-0.3	C105H82O42	[M-2H]2-	(E)C	7	A	2	[M-2H]2-	289.072(26%), 411.072(27%), 861.168(85%), 863.183(100%), 1151.238(36%)	287.056(95%), 411.072(100%), 449.088(41%), 573.104(39%), 575.12(44%)	285.04(55%), 287.056(59%), 289.072(29%), 407.077(38%), 411.072(100%)
39	22.54	250000000	0.468165	862.175	0.2	C90H70O36	[M-2H]2-	(E)C	6	A	2	[M-2H]2-	287.056(41%), 289.072(31%), 411.072(40%), 575.119(56%), 711.136(100%)	287.056(98%), 289.072(64%), 411.072(100%), 575.12(82%), 693.124(58%)	243.03(43%), 285.04(82%), 287.056(47%), 289.072(57%), 411.072(100%)
40	22.66	890000000	1.66667	575.12	-0.4	C60H48O24	[M-2H]2-	(E)C	4	A	1	[M-2H]2-	287.056(14%), 289.072(100%), 411.072(24%), 861.166(37%)	125.024(27%), 285.04(42%), 287.056(61%), 289.072(100%), 407.077(27%), 411.072(58%)	125.024(81%), 243.03(80%), 285.04(100%), 289.072(40%), 411.072(46%)
41	22.89	150000000	0.280899	573.104	-0.3	C60H44O24	[M-2H]2-	(E)C	4	A	3	[M-H]-	NA	575.118(7%), 735.136(72%), 861.166(14%), 1129.203(100%)	411.072(38%), 529.078(45%), 689.094(100%), 735.136(72%), 1129.204(89%)
42	23.02	340000000	0.636704	863.183	1.4	C90H72O36	[M-2H]2-	(E)C	6	A	1	[M-2H]2-	289.072(32%), 411.073(28%), 575.119(100%), 711.135(79%)	287.056(36%), 289.072(27%), 411.072(36%), 575.12(100%), 693.125(32%)	285.04(100%), 287.056(62%), 289.072(67%), 407.077(49%), 411.072(57%)
43	23.17	1300000000	2.43446	575.12	-0.6	C60H48O24	[M-2H]2-	(E)C	4	A	1	[M-2H]2-	575.119(100%), 863.182(29%)	287.056(41%), 413.088(12%), 423.072(11%), 575.119(100%), 711.136(11%), 863.182(12%)	243.03(21%), 287.056(100%), 449.088(22%), 575.12(36%), 693.125(26%)
44	23.4	1400000000	2.62172	718.144	-0.8	C75H58O30	[M-2H]2-	(E)C	5	A	2	[M-2H]2-	289.072(52%), 411.072(100%), 573.104(37%), 642.12(100%), 863.182(22%)	285.04(51%), 289.072(51%), 407.077(18%), 411.072(100%), 573.104(20%)	243.03(36%), 285.04(96%), 289.072(37%), 407.077(39%), 411.072(100%)
45	23.6	990000000	1.85393	574.112	-0.5	C60H46O24	[M-2H]2-	(E)C	4	A	2	[M-2H]2-	285.04(23%), 411.072(100%), 453.083(27%), 499.095(22%), 695.141(21%)	285.04(100%), 287.056(25%), 289.072(43%), 411.072(80%), 449.088(34%)	125.024(68%), 243.03(63%), 285.041(100%)
46	23.71	380000000	0.71161	719.152	-0.5	C75H60O30	[M-2H]2-	(E)C	5	A	1	[M-2H]2-	289.072(84%), 411.072(54%), 575.12(91%), 634.122(79%), 643.127(100%)	125.024(33%), 287.056(75%), 289.072(100%), 407.077(44%), 411.072(66%)	125.024(61%), 243.03(77%), 285.04(100%), 289.072(53%), 411.072(76%)
47	23.8	570000000	1.06742	575.12	-0.6	C60H48O24	[M-2H]2-	(E)C	4	A	1	[M-2H]2-	125.024(35%), 287.056(47%), 411.072(100%), 449.088(32%), 453.083(30%)	285.04(100%), 287.056(56%), 289.072(54%), 411.072(55%), 449.088(60%)	125.024(100%), 161.024(39%), 175.04(39%), 243.03(91%), 285.04(93%)
48	23.93	330000000	0.617978	719.151	-0.3	C75H60O30	[M-2H]2-	(E)C	5	A	1	[M-2H]2-	289.072(84%), 411.072(54%), 575.12(91%), 634.122(79%), 643.127(100%)	125.024(33%), 287.056(75%), 289.072(100%), 407.077(44%), 411.072(66%)	125.024(61%), 243.03(77%), 285.04(100%), 289.072(53%), 411.072(76%)
49	24.07	1000000000	1.87266	718.144	-1.5	C75H58O30	[M-2H]2-	(E)C	5	A	2	[M-2H]2-	287.56(7%), 449.088(5%), 575.119(100%), 861.167(48%)	285.04(55%), 287.056(100%), 411.072(61%), 449.088(67%), 575.119(89%)	125.024(40%), 285.04(100%), 287.056(42%), 289.072(43%), 411.072(67%)
50	24.15	190000000	0.355805	577.136	-1.2	C30H26O12	[M-H]-	(E)C	2	B	0	NA	NA	NA	NA
51	24.23	690000000	1.29213	575.12	-0.9	C30H24O12	[M-H]-	(E)C	2	A	1	[M-H]-	287.056(23%), 289.072(33%), 407.077(28%), 423.072(68%), 425.088(100%)	285.04(49%), 289.072(88%), 407.077(100%), 423.072(31%), 449.088(23%)	125.024(61%), 203.071(36%), 255.03(43%), 281.046(46%), 285.04(100%)
52	24.32	230000000	0.430712	862.176	-0.7	C90H70O36	[M-2H]2-	(E)C	6	A	2	[M-2H]2-	289.072(43%), 575.119(100%), 711.135(54%), 786.151(67%)	285.04(42%), 287.056(47%), 289.072(64%), 411.072(100%), 575.119(78%)	285.04(100%), 287.056(42%), 289.072(60%), 407.077(62%), 411.072(88%)
53	24.33	330000000	0.617978	719.152	-1	C75H60O30	[M-2H]2-	(E)C	5	A	1	[M-2H]2-	287.056(22%), 289.072(40%), 411.072(30%), 575.119(100%), 861.167(39%)	285.04(61%), 287.056(100%), 289.072(71%), 411.072(94%), 449.088(53%)	125.024(44%), 243.03(40%), 285.04(100%), 289.072(39%), 411.072(53%)
54	24.48	2200000000	4.11985	863.185	-2.1	C45H36O18	[M-H]-	(E)C	3	A	1	[M-H]-	287.056(19%), 575.119(98%), 711.135(100%)	423.072(9%), 449.088(10%), 575.12(100%), 693.125(34%), 711.136(24%)	285.041(100%), 289.072(69%), 403.046(62%), 449.088(66%), 657.104(51%)
55	24.59	740000000	1.38577	575.12	-1.1	C60H48O24	[M-2H]2-	(E)C	4	A	1	[M-2H]2-	863.184(100%)	287.056(13%), 411.072(13%), 575.12(90%), 711.135(31%), 863.183(100%), 999.197(13%)	285.04(33%), 287.056(47%), 449.088(42%), 575.119(100%), 693.125(46%)
56	24.77	370000000	0.692884	718.144	-0.6	C75H58O30	[M-2H]2-	(E)C	5	A	2	[M-2H]2-	411.072(100%), 575.12(45%), 642.12(56%), 643.123(20%), 1025.213(19%)	285.04(51%), 287.056(29%), 411.072(100%), 575.12(39%), 693.125(26%)	125.024(46%), 243.03(46%), 285.04(100%), 407.077(38%), 411.072(68%)
57	24.84	140000000	0.262172	865.199	-1	C45H38O18	[M-H]-	(E)C	3	B	0	[M-H]-	287.056(21%), 575.119(100%), 711.137(17%), 1151.245(16%)	287.056(96%), 407.077(32%), 449.088(38%), 575.119(100%), 577.135(35%)	243.03(64%), 285.04(51%), 287.056(70%), 289.072(62%), 407.077(100%)
58	24.93	420000000	0.786517	719.152	-0.5	C75H60O30	[M-2H]2-	(E)C	5	A	1	[M-2H]2-	287.056(44%), 411.072(64%), 575.119(100%), 642.119(32%), 863.183(41%)	125.024(36%), 285.04(45%), 287.056(61%), 411.072(65%), 575.119(100%)	125.024(88%), 243.03(83%), 285.04(100%), 407.077(49%), 411.072(56%)
59	25.08	940000000	1.7603	575.12	-1.6	C60H48O24	[M-2H]2-	(E)C	4	A	1	[M-2H]2-	287.056(100%), 405.062(34%), 413.088(29%), 449.088(37%), 490.091(36%)	243.03(64%), 285.04(47%), 287.056(100%), 289.072(83%), 449.088(78%)	125.024(78%), 161.024(35%), 175.04(35%), 243.03(100%), 285.04(56%)
60	25.15	2200000000	4.11985	863.185	-2	C45H38O18	[M-H]-	(E)C	3	B	0	[M-H]-	711.135(100%)	287.56(7%), 449.088(12%), 575.12(100%), 693.125(59%), 711.136(18%)	285.041(100%), 289.072(81%), 403.046(88%), 449.088(69%), 657.104(70%)
61	25.44	480000000	0.898876	862.176	-1.6	C90H70O36	[M-2H]2-	(E)C	6	A	2	[M-2H]2-	575.119(100%), 711.136(43%), 1149.229(22%)	287.056(48%), 411.072(47%), 449.088(25%), 575.119(100%), 693.125(18%)	243.03(39%), 285.04(100%), 287.056(66%), 289.072(48%), 411.072(89%)
62	25.44	1800000000	3.37079	719.152	-1.2	C75H60O30	[M-2H]2-	(E)C	5	A	1	[M-2H]2-	287.056(12%), 449.088(6%), 575.119(100%), 634.122(11%), 863.183(30%)	285.04(25%), 287.056(86%), 289.072(42%), 449.088(61%), 575.119(100%)	125.024(63%), 243.03(100%), 285.04(77%), 287.056(49%), 289.072(40%)
63	25.62	590000000	1.10487	574.113	-1.9	C60H46O24	[M-2H]2-	(E)C	4	A	2	[M-2H]2-	285.04(39%), 411.072(83%), 575.119(100%), 737.157(11%)	285.04(100%), 289.072(62%), 411.072(88%), 575.12(56%), 693.124(28%)	125.024(93%), 285.04(100%)
64	25.66	600000000	1.1236	718.145	-2.1	C75H58O30	[M-2H]2-	(E)C	5	A	2	[M-2H]2-	411.072(20%), 575.119(100%), 861.167(34%), 1025.215(5%), 1149.23(5%)	285.04(29%), 287.056(50%), 411.072(72%), 449.088(43%), 575.119(100%)	243.03(38%), 285.04(100%), 287.056(39%), 289.072(36%), 411.072(64%)
65	25.78	250000000	0.468165	575.12	-1.8	C60H48O24	[M-2H]2-	(E)C	4	A	1	[M-H]-	NA	287.056(16%), 449.088(7%), 575.119(100%), 711.135(7%), 863.182(17%), 999.199(9%)	287.056(57%), 289.072(22%), 449.088(37%), 575.119(100%), 693.126(21%)
66	25.97	2000000000	3.74532	718.144	-1.5	C75H58O30	[M-2H]2-	(E)C	5	A	2	[M-2H]2-	411.072(32%), 575.119(100%), 861.167(21%), 1025.222(4%)	285.04(70%), 287.056(74%), 411.072(85%), 449.088(61%), 575.12(100%)	125.024(59%), 243.03(66%), 285.041(100%), 287.056(37%), 411.072(43%)
67	26.13	180000000	0.337079	861.168	1.3	C45H34O18	[M-H]-	(E)C	3	A	2	[M-H]-	NA	NA	NA
68	26.43	390000000	0.730337	719.151	-0.3	C75H60O30	[M-2H]2-	(E)C	5	A	1	[M-2H]2-	287.056(24%), 411.072(20%), 575.12(100%), 643.126(19%), 863.183(20%)	285.04(70%), 287.056(74%), 411.072(85%), 449.088(61%), 575.12(100%)	125.024(80%), 243.03(88%), 285.04(100%), 287.056(38%), 289.072(42%)
69	26.86	630000000	1.17978	862.175	-0.1	C90H70O36	[M-2H]2-	(E)C	6	A	2	[M-2H]2-	575.12(99%), 786.152(24%), 861.167(53%), 863.18(100%), 1149.229(23%)	285.04(25%), 287.056(52%), 411.072(62%), 423.072(25%), 449.088(35%), 575.119(100%)	243.03(42%), 285.04(100%), 287.056(60%), 289.072(34%), 411.072(77%)
70	27.24	1600000000	2.99625	574.113	-1.7	C60H46O24	[M-2H]2-	(E)C	4	A	2	[M-H]-	NA	411.072(17%), 531.094(19%), 575.12(100%), 737.152(21%), 997.184(22%)	285.041(53%), 411.072(85%), 449.088(61%), 575.12(100%), 979.173(48%)
71	27.52	710000000	1.32959	718.144	-0.3	C75H58O30	[M-2H]2-	(E)C	5	A	2	[M-2H]2-	411.072(27%), 449.088(17%), 575.119(100%), 642.12(17%), 861.167(30%)	285.04(64%), 287.056(82%), 411.072(100%), 449.088(57%), 575.119(64%)	125.024(32%), 243.03(32%), 285.04(100%), 287.056(24%), 411.072(61%)
72	27.91	2000000000	3.74532	718.144	-0.7	C75H58O30	[M-2H]2-	(E)C	5	A	2	[M-2H]2-	411.072(27%), 423.072(17%), 575.119(100%), 642.12(19%), 861.167(33%)	285.04(66%), 287.056(83%), 411.072(100%), 449.088(54%), 575.119(59%)	125.024(33%), 243.03(31%), 285.04(100%), 287.056(25%), 411.072(58%)
73	28.14	400000000	0.749064	862.175	0.1	C90H70O36	[M-2H]2-	(E)C	6	A	2	[M-2H]2-	575.119(100%), 737.155(13%), 786.152(26%), 861.168(43%), 1149.232(25%)	287.056(35%), 411.072(45%), 449.088(36%), 573.104(27%), 575.12(100%)	243.03(30%), 285.04(100%), 287.056(42%), 289.072(37%), 411.072(57%)
74	28.36	320000000	0.599251	574.112	-0.2	C60H46O24	[M-2H]2-	(E)C	4	A	2	[M-H]-	NA	411.072(21%), 531.093(15%), 573.104(28%), 575.12(100%), 737.152(15%)	285.04(92%), 287.056(89%), 411.072(100%), 449.088(70%), 575.12(79%)
75	29.39	140000000	0.262172	863.183	0.3	C45H36O18	[M-H]-	(E)C	3	A	1	[M-H]-	287.056(100%), 575.12(73%)	125.024(25%), 287.056(100%), 289.072(50%), 411.073(25%), 575.117(50%)	125.024(45%), 245.082(35%), 285.04(66%), 287.056(48%), 289.072(100%)
76	29.69	310000000	0.580524	861.167	0.3	C45H34O18	[M-H]-	(E)C	3	A	2	[M-H]-	575.12(100%)	287.055(67%), 289.072(75%), 411.072(55%), 575.119(93%), 709.12(100%)	285.04(100%), 287.056(35%), 289.072(66%), 411.073(35%), 445.056(43%), 539.096(35%), 571.088(62%)
77	31.85	210000000	0.393258	861.167	0.4	C90H68O36	[M-2H]2-	(E)C	6	A	3	[M-2H]2-	411.072(100%), 575.119(97%), 737.155(22%), 1311.242(19%)	285.04(41%), 411.072(100%), 449.088(22%), 573.105(32%), 575.12(61%)	285.04(100%), 287.056(25%), 289.072(25%), 411.072(98%), 449.087(22%)
78	33.25	280000000	0.524345	861.167	0.8	C45H34O18	[M-H]-	(E)C	3	A	2	[M-H]-	NA	287.063(100%), 411.072(46%), 423.072(96%), 449.089(64%), 575.12(90%)	243.03(35%), 285.04(100%), 287.056(42%), 407.077(45%), 411.072(41%)
